# Supplementary material
Source: PubMed Central journal article supplement (PMC6261503)
Supplement: NIHMS1511168-supplement-1.pdf [file NIHMS1511168-supplement-1.pdf]

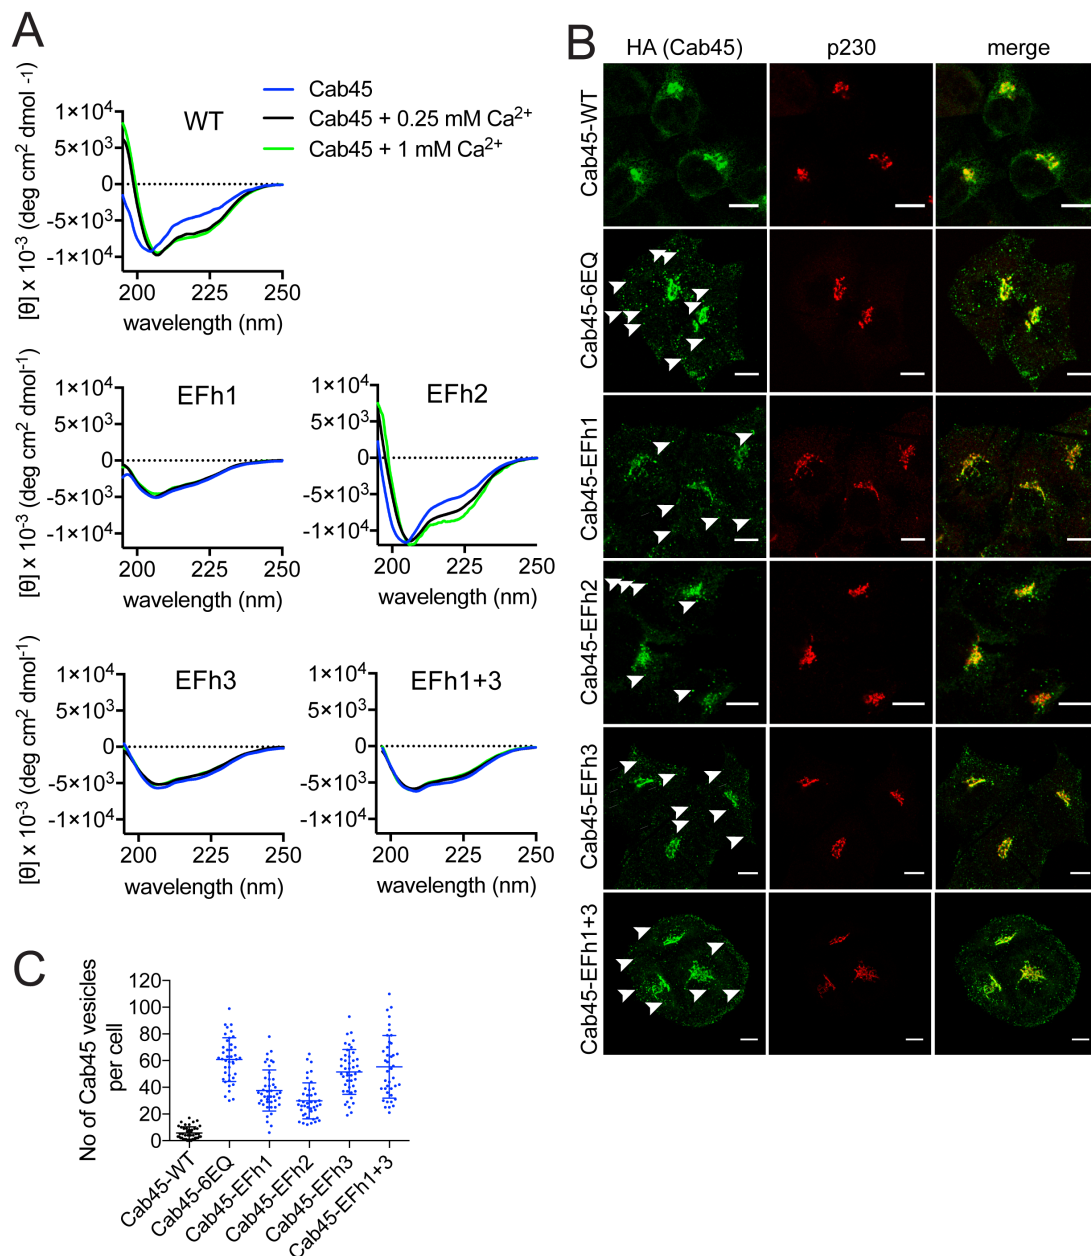

**Figure S1. Cab45 EFh mutant expression shows vesicular localization, Related to Figure 2. (A)** Far-UV CD analysis of recombinant Cab45 and the Cab45-EFh1, Cab45-EFh2, Cab45-EFh3 and Cab45-EFh1+3 mutants in the presence and absence of 0.25 mM or 1 mM  $\text{Ca}^{2+}$ . **(B)** HeLa Cab45-KO cells were stably transfected with either Cab45-WT or the mutants Cab45-6EQ, Cab45-EFh1, Cab45-EFh2, Cab45-EFh3 and Cab45-EFh1+3. Cells were visualized by anti-HA for Cab45 (green) and anti-p230 as a TGN marker (red)

and analyzed by confocal microscopy. Arrowheads point to cytoplasmic vesicles. Bars, 10  $\mu\text{m}$ . **(C)** The number of Cab45 vesicles per cell was quantified for Cab45-KO cells stably expressing Cab45-WT, and the mutants Cab45-6EQ, Cab45-EFh1, Cab45-EFh2, Cab45-EFh3 and Cab45-EFh1+3.

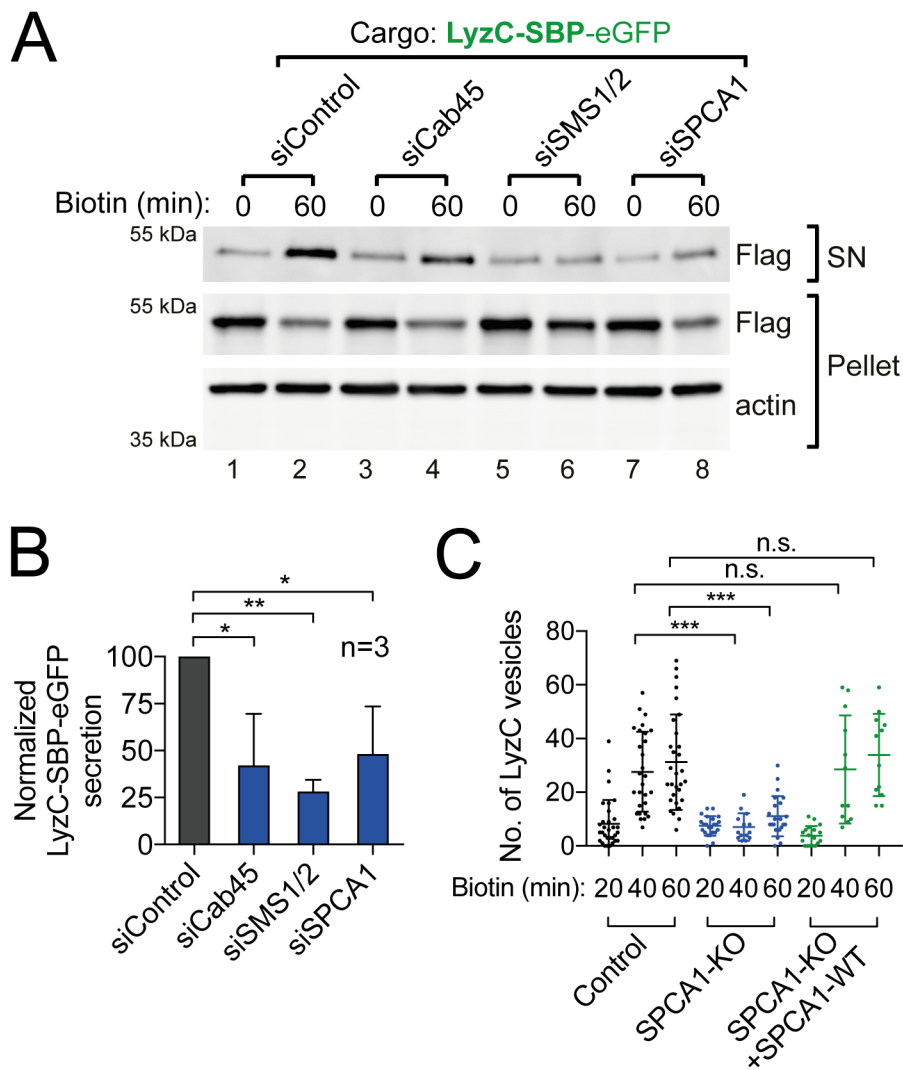

**Figure S2. Depletion of SPCA1 impairs LyzC secretion and cargo sorting, Related to Figure 3 and Figure 4. (A)** Depletion of SMS1/2, and SPCA1, cause retention of LyzC-SBP-eGFP within cells. HeLa cells transfected with control, Cab45, SMS1/2 and SPCA1 siRNA were transfected with LyzC-SBP-eGFP. Cell culture supernatants and whole cell lysates of cells were collected after 60 min incubation with Biotin and probed for FLAG epitope tagged LyzC-SBP-eGFP by immunoblotting. Actin was detected in the lysates as a loading control. **(B)** Semi-quantitative analysis of LyzC secretion by normalizing LyzC supernatant signals to their respective actin loading control. LyzC secretion was then determined by the ratio of 60 min to 0 min

samples after Biotin addition and normalized to control siRNA treated cells. The means ( $\pm$  s.d.) from 3 independent experiments are plotted. **(C)** The number of LyzC vesicles was quantified in HeLa control or SPCA1 null cells expressing either LyzC-SBP-eGFP alone, or co-transfected with SPCA1-WT. Vesicle counts (mean  $\pm$  s.d.) from at least 12 cells per condition in 3 independent experiments are plotted.

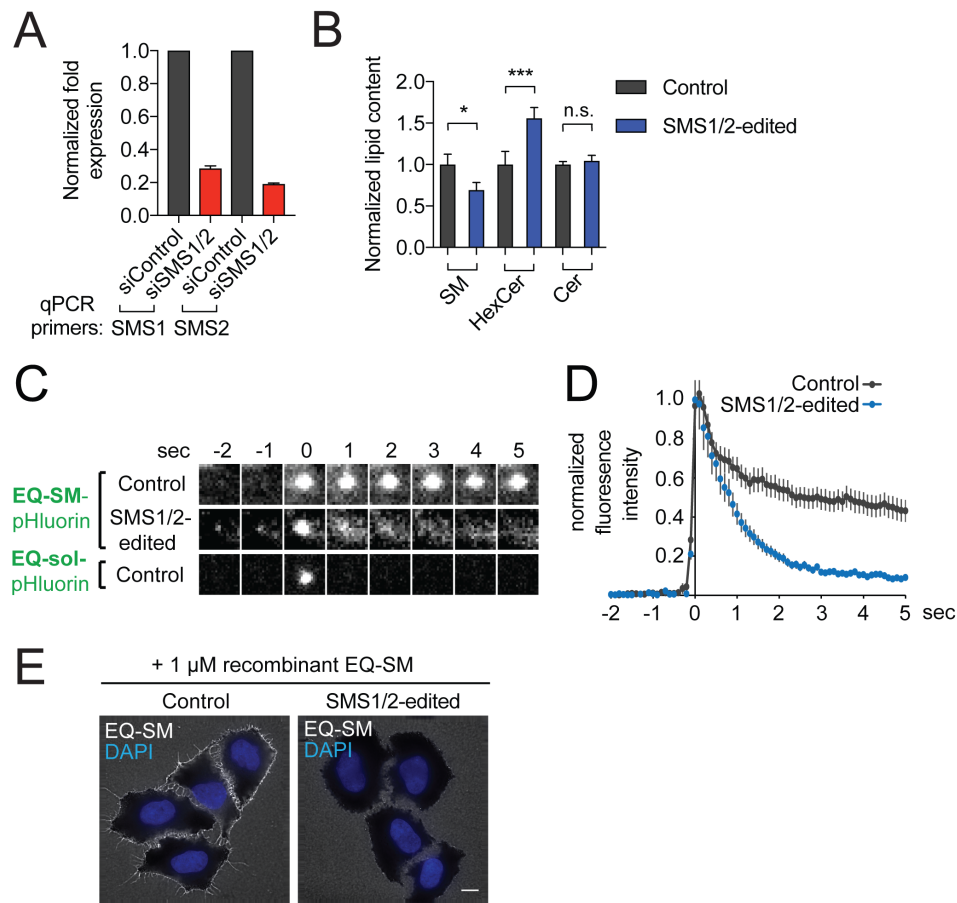

**Figure S3. Characterization of SM depleted cells lines, Related to Figure**

**4. (A)** Quantitative real-time PCR of cells treated with SMS1/2 siRNA confirmed a reduction of mRNA expression of SMS1 and SMS2 to 26.8% and 19% compared to cells treated with control siRNA. Samples were normalized to the housekeeping gene GAPDH and the data was presented as relative expression fold change normalized to control cells. A representative experiment with the means (s.e.m.) of technical triplicates is shown. **(B)** Sphingolipid analysis of SMS1 and SMS2 depleted cells. The relative amounts of the indicated sphingolipid species are shown. The values are the means (s.e.m.) of three replicate measurements.  $P < 0.05$  for SM,  $P < 0.01$  for HexCer. **(C)** Time-lapse TIRF micrographs of HeLa control or SMS1/2-edited cells expressing either EQ-SM-pHluorin or EQ-sol-pHluorin. Note that EQ-SM-

pHluorin remains bound to the plasma membrane at the site of exocytosis in unmodified control cells, but it dissipates from the site of exocytosis in SMS1/2-edited HeLa cells. A time-lapse gallery of micrographs showing dissipation of EQ-sol-pHluorin after exocytosis is shown for comparison. **(D)** Fluorescence intensity profiles of EQ-SM-pHluorin exocytosis. The normalized mean fluorescence intensities (s.e.m.) of 34 and 57 exocytic events (control and SMS1/2-edited, respectively) in TIRF micrographs are plotted. Fluorescence values were normalized to the peak intensity observed for each series. **(E)** HeLa control and SMS1/2-edited cells were incubated with 1  $\mu$ M recombinant EQ-SM to probe SM at the plasma membrane. EQ-SM containing a FLAG epitope was visualized by immunofluorescence of anti-FLAG (white) and DAPI to label the nucleus. Bars, 10  $\mu$ m.

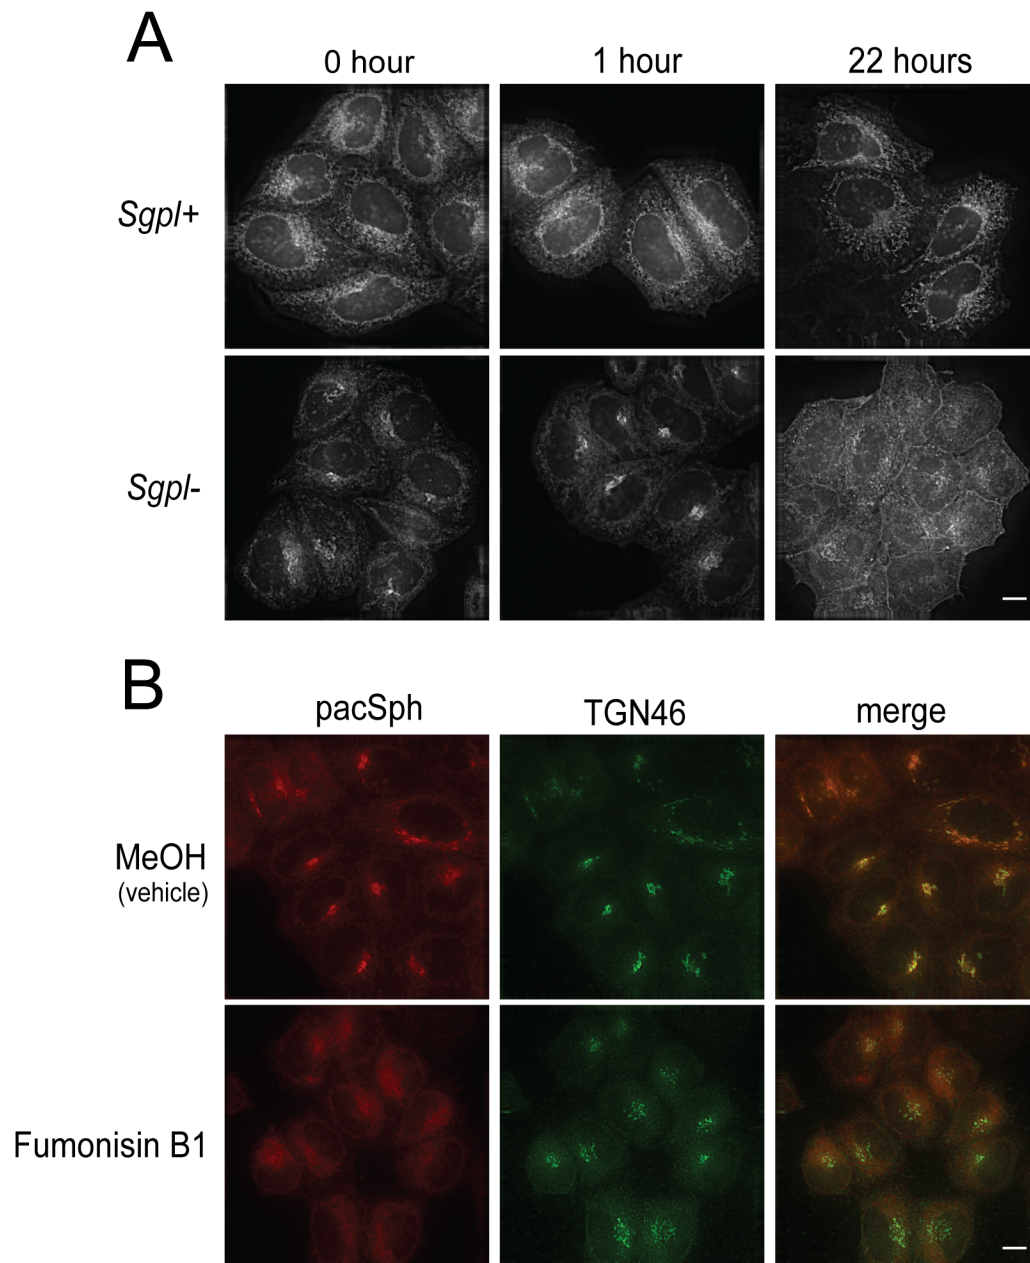

**Figure S4. Pac-sphingosine-labeled sphingolipids are trafficked to the Golgi apparatus and then the plasma membrane, Related to Figure 5. (A)** Time course of pacSph labeling of control (*SGPL1+*) and *SGPL1* null (*SGPL1-*) cells. *SGPL1-* HeLa cells and control parental cells (*SGPL1+*) were incubated with 0.6  $\mu$ M pacSph for 30 minutes, followed by a chase period of 1 or 22 hours in medium lacking pacSph. Fixed, permeabilized cells were incubated with click chemistry reagents to covalently attached Alexa647

fluorophore to pacSph. Cells were visualized by deconvolution fluorescence microscopy. Bars, 10  $\mu\text{m}$ . Note that pacSph-labeled sphingolipids are trafficked to the Golgi apparatus and then the plasma membrane. **(B)** An inhibitor of ceramide synthase, fumonisin B1 (FB1), prevents targeting of pacSph to the Golgi apparatus. *SGPL1*- HeLa cells were pre-incubated with FB1 (50  $\mu\text{M}$ ) for 24 hours, followed by labeling of cells with 0.6  $\mu\text{M}$  pacSph. Cells were processed to label pacSph with Alexa647 and for immunofluorescence detection of TGN46 to identify the Golgi apparatus. Scale bars, 10  $\mu\text{m}$ .



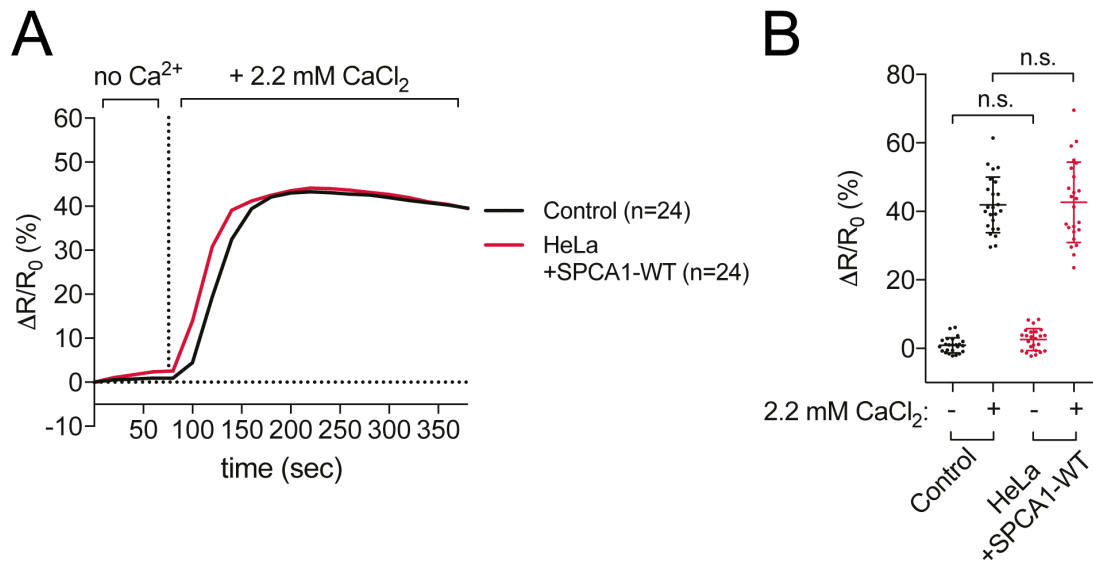

**Figure S5. Overexpression of SPCA1 does not alter Ca<sup>2+</sup> influx, Related to Figure 6.** (A) Quantification of FRET images of HeLa control cells and cells that overexpress SPCA1-WT. Fluorescence signals reflecting TGN [Ca<sup>2+</sup>] are presented as  $\Delta R/R_0$ . Data are plotted as the mean Ca<sup>2+</sup> influx over time. (B) Data are plotted as the mean  $\pm$  s.d. Ca<sup>2+</sup> influx at before Ca<sup>2+</sup> addition (at 80 sec) or after Ca<sup>2+</sup> addition (at 300 sec). Data was acquired for at least 24 cells per condition in two independent experiments.

| object 1 | object 2 | R =         | n  |
|----------|----------|-------------|----|
| SPCA1    | GM130    | 0.58 ± 0.07 | 37 |
|          | p230     | 0.54 ± 0.08 | 38 |
|          | SMS1     | 0.76 ± 0.06 | 75 |
| SMS1     | GM130    | 0.33 ± 0.06 | 37 |
|          | p230     | 0.62 ± 0.09 | 38 |
| pacSph   | GM130    | 0.49 ± 0.08 | 32 |
|          | p230     | 0.76 ± 0.06 | 22 |

**Table S2. Pearson's correlation analysis for Golgi residents, Related to**

**Figure 5.** The mean Pearson's correlation coefficients (R) ( $\pm$  s.d) were determined for the indicated pairs of proteins or pacSph-labeled lipids. The number of cells analyzed for each condition is indicated (n).
